# Supplementary material for: Hormesis of some organic solvents on Vibrio qinghaiensis sp.-Q67 from first binding to the β subunit of luciferase
Source: Royal Society of Chemistry journal article supplement (doi:10.1039/c7ra06503e), 2017-01-01
Supplement: c7ra06503e1.pdf [file c7ra06503e1.pdf]

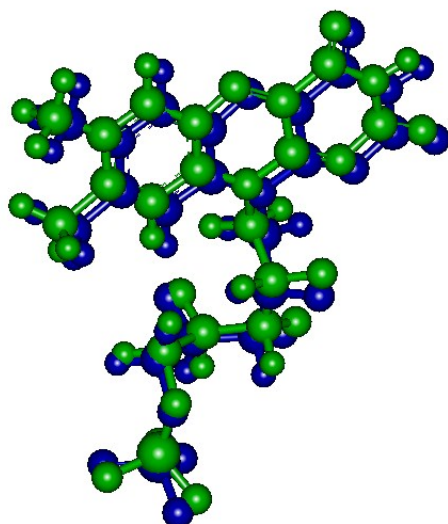

Fig. S1 The FMN overlay between the best Amber score conformation (green color) and original conformation (blue color).

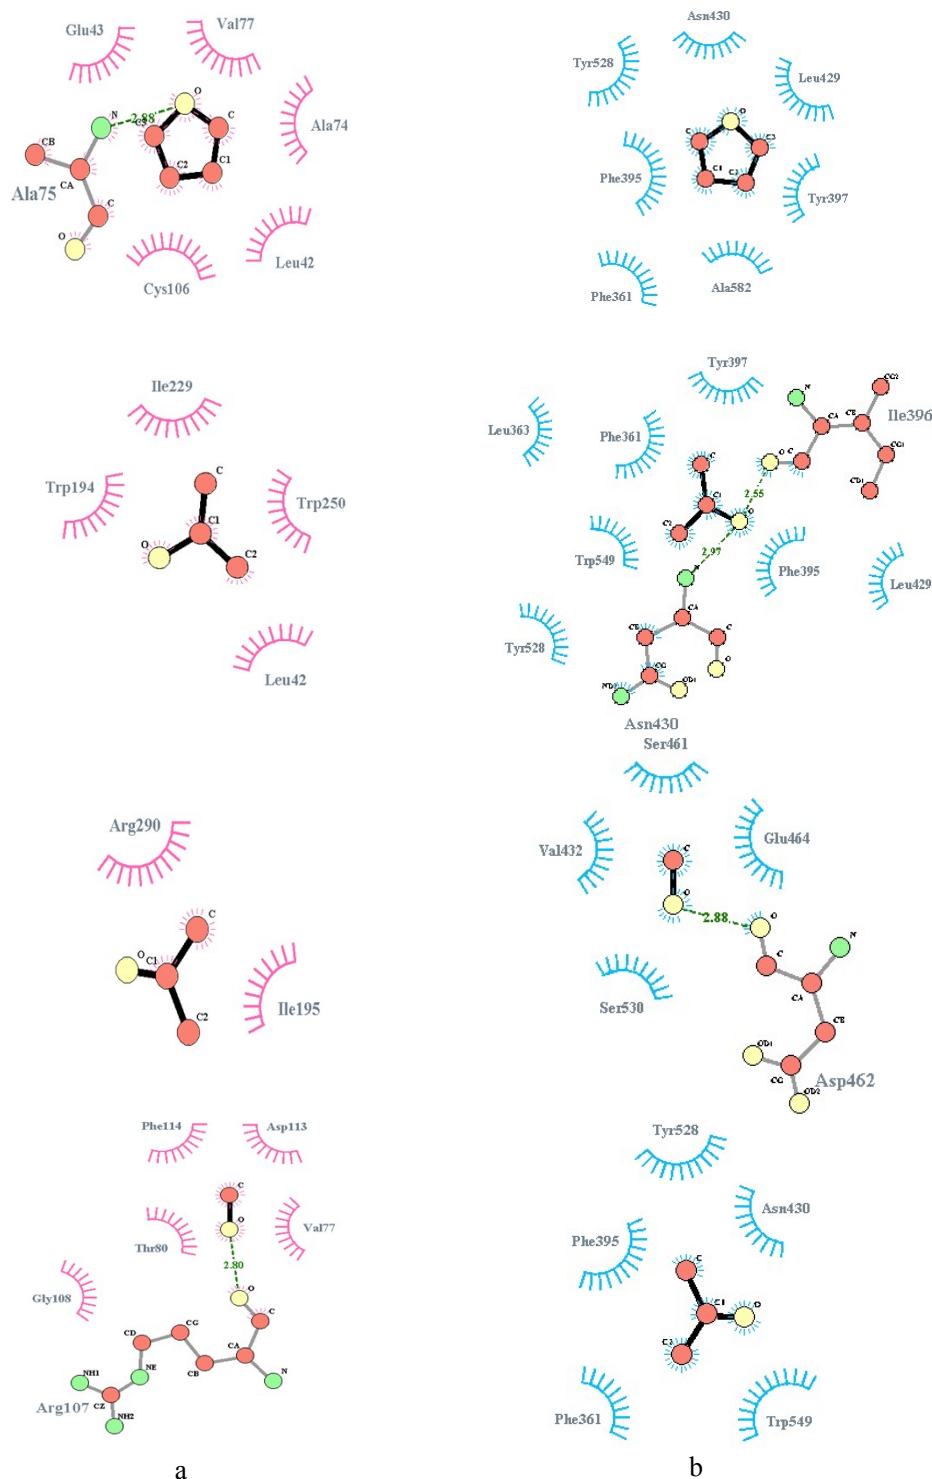

Fig. S2 (a) Hydrogen bond interaction patterns and hydrophobic contacts between four J-shaped organic solvents (THF, isopropanol, acetone, methanol from top to bottom) and the side chain and backbone of binding residues in Q67Luc $\alpha$ , where the hydrogen bond contact is expressed by green lines and hydrophobic contact groups are expressed by eyelash shaped curve. (b) Hydrogen bond interaction patterns and hydrophobic contacts between four J-shaped organic solvents and the side chain and backbone of binding residues in Q67Luc $\beta$ .

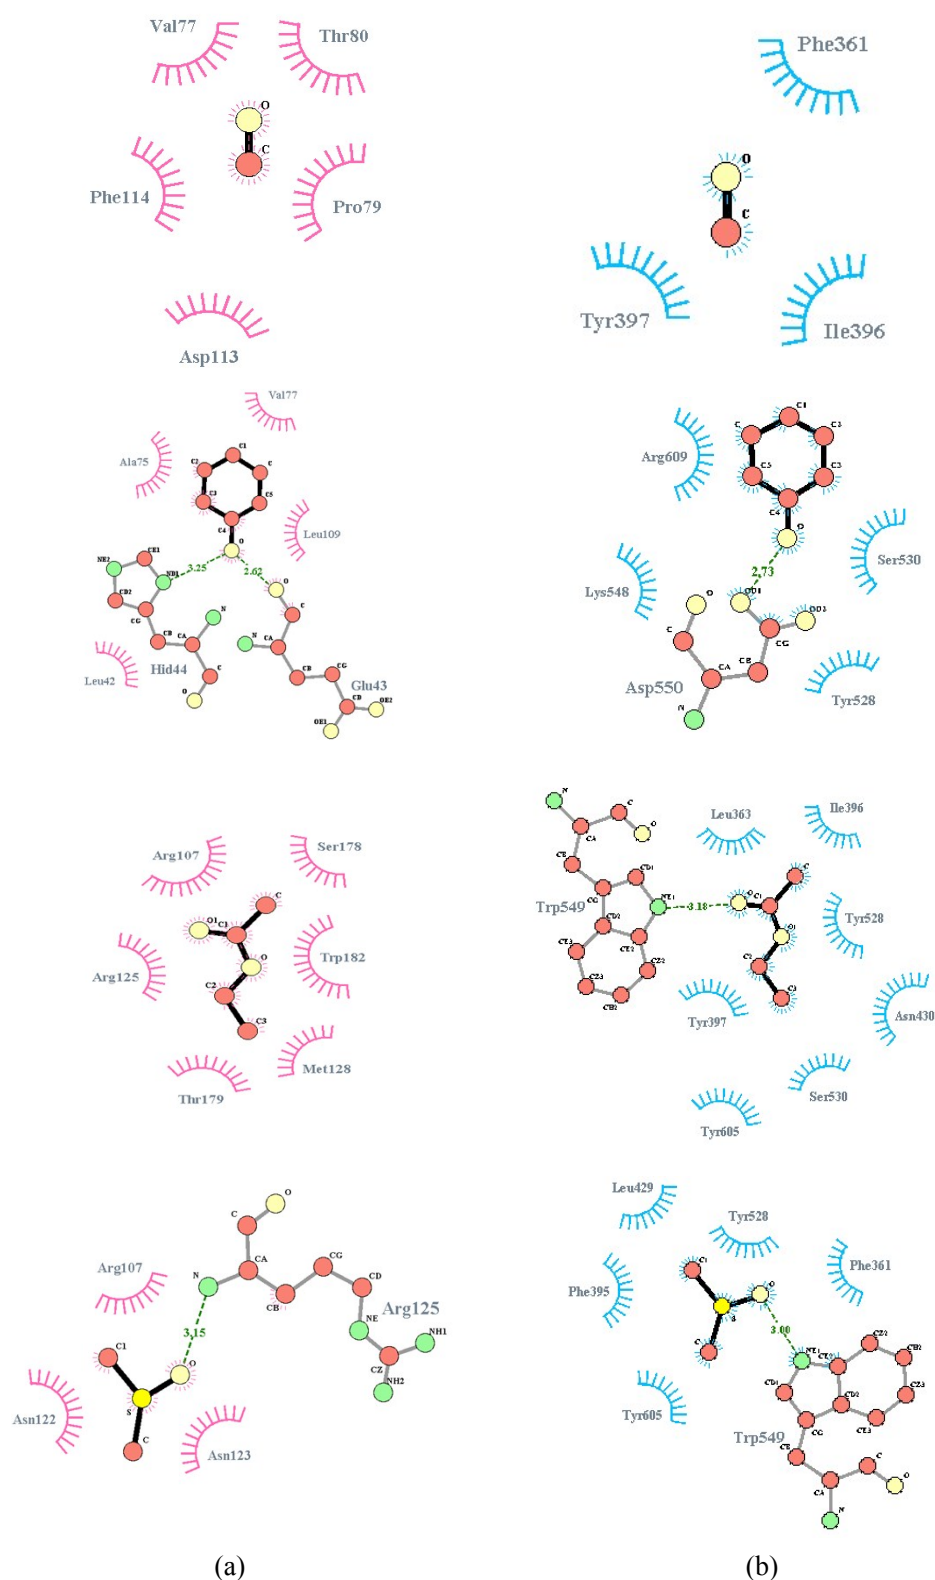

Fig.S3 (a) Hydrogen bond interaction patterns and hydrophobic contacts between four S-shaped organic solvents (formaldehyde, phenol, EAC, DMSO from top to bottom) and the side chain and backbone of binding residues in Q67Luc $\alpha$ , where the hydrogen bond contact is expressed by green lines and hydrophobic contact groups are expressed by eyelash shaped curve. (b) Hydrogen bond interaction patterns and hydrophobic contacts between four S-shaped organic solvents and the side chain and backbone of binding residues in Q67Luc $\beta$ .

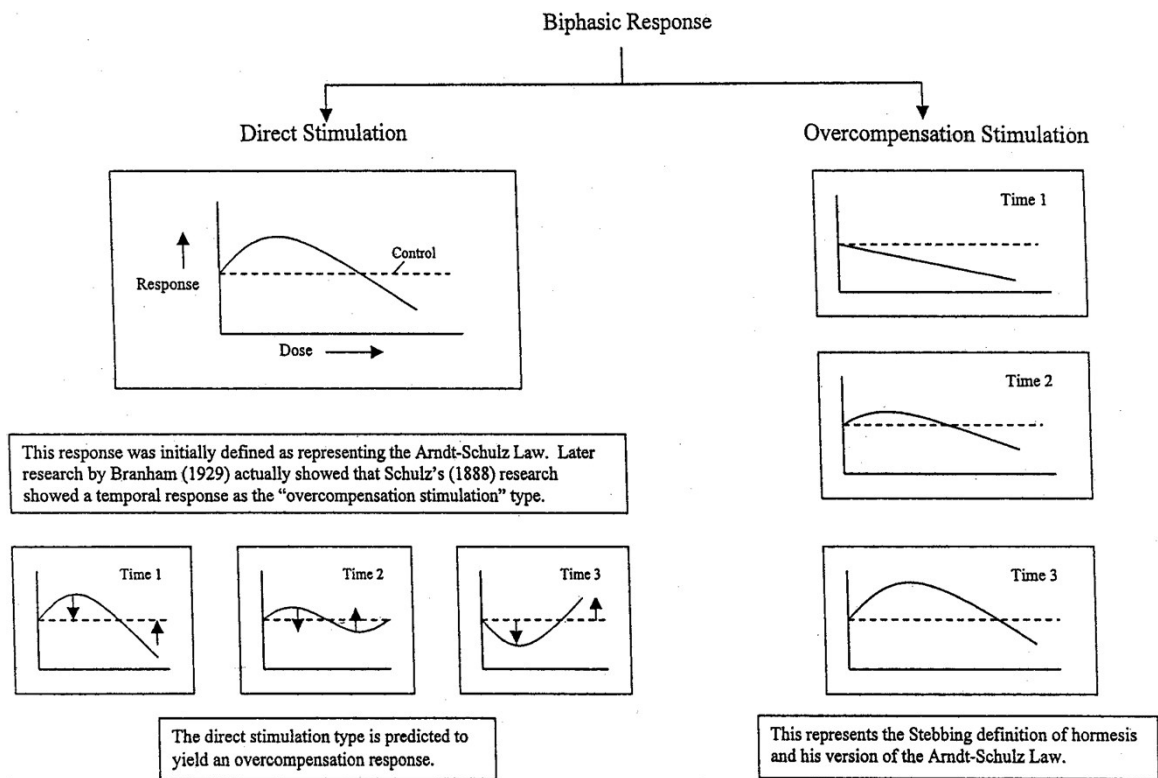

Fig. S4 Comparison of direct stimulation and overcompensation stimulation hormesis (from Calabrese and Baldwin<sup>53</sup>)
